# Supplementary material for: Weed Communities in Winter Wheat: Responses to Cropping Systems under Different Climatic Conditions
Source: MDPI journal article supplement (doi:10.3390/su14116880), 2022-06-05
Supplement: s1 [file s1]

# Supplementary Materials:

**Table S1.** Average monthly temperature and total monthly precipitation from PRISM <sup>1</sup> during important winter wheat growth stages in 2016 and 2017, when the experiment was conducted, and the 30-year average from 1981-2010.

| Month   | 2016              |                   | 2017              |                   | 1981-2010 Average |                   |
|---------|-------------------|-------------------|-------------------|-------------------|-------------------|-------------------|
|         | Average Temp (°C) | Total Precip (mm) | Average Temp (°C) | Total Precip (mm) | Average Temp (°C) | Total Precip (mm) |
| March   | 3.7               | 48                | 5.1               | 42                | 1.6               | 34                |
| April   | 7.9               | 53                | 6                 | 93                | 5.8               | 57                |
| May     | 9.8               | 68                | 10.6              | 69                | 10.4              | 79                |
| June    | 16                | 28                | 15.2              | 69                | 14.5              | 79                |
| 4-month | 9.4               | 197               | 9.2               | 273               | 8.1               | 249               |

<sup>1</sup>PRISM Climate Group. (2018). Oregon State University. <http://prism.oregonstate.edu>.

**Table S2.** Agronomic management details in cover crops and winter wheat across conventional no-till, reduced-till grazed organic, and tilled organic between 2013 to 2017 at Fort Ellis Research and Extension Center in Bozeman, MT, USA.

|      | Syste                |              |                                                                                                                                                                                                                                                                                             |
|------|----------------------|--------------|---------------------------------------------------------------------------------------------------------------------------------------------------------------------------------------------------------------------------------------------------------------------------------------------|
| Year | m                    | Crop         | Agronomic management details                                                                                                                                                                                                                                                                |
| 2013 | Conventional no-till | Cover crop   | Glyphosate (1680 g ai/ha) preemergence, Dicamba (280 g ai/ha) mixed with *Hel-Fire adjuvant (897 ml/ha). ^Seeding rate = 95 kg/ha.                                                                                                                                                          |
|      |                      | Winter wheat | 2,4-D (700 g ai/ha), Dicamba (210 g ai/ha). ¥Urea (336 kg/ha). Seeding rate = 63 kg/ha.                                                                                                                                                                                                     |
| 2014 |                      | Cover crop   | Glyphosate (2241 g ai/ha) 2X mixed with **MSO adjuvant (1793 ml/ha) 2X, Saflufenacil (140 g ai/ha) 2X mixed with \$AWS adjuvant (210 ml/ha) 2X                                                                                                                                              |
|      |                      | Winter wheat | acid ester of bromoxynil + 2-ethylhexyl ester of MCPA (841 g ai/ha). Seeding rate = 61 kg/ha.                                                                                                                                                                                               |
| 2015 |                      | Cover crop   | (2241 g ai/ha) mixed with *R11 adjuvant (897 ml/ha), Saflufenacil (140 g ai/ha) mixed with AWS adjuvant (105 ml/ha)                                                                                                                                                                         |
|      |                      | Winter wheat | ml/ha). Urea (390 kg/ha). Seeding rate = 79 kg/ha.                                                                                                                                                                                                                                          |
| 2016 |                      | Cover crop   | Glyphosate (2241 g ai/ha) mixed with Hel-Fire adjuvant (448 gm/ha), 2,4-D (1680 g ai/ha) mixed with R11 adjuvant (448 ml/ha)                                                                                                                                                                |
|      |                      | Winter wheat | Glyphosate (1680 g ai/ha) preemergence mixed with Hel-Fire adjuvant (448 ml/ha), Glyphosate (2241 g ai/ha) preemergence mixed with R11 adjuvant (448 ml/ha), fluroxypyr 1-methylheptyl ester (1121 g ai/ha) mixed with AWS adjuvant (105 ml/ha). Urea (244 kg/ha). Seeding rate = 79 kg/ha. |
| 2017 |                      | Cover crop   | Glyphosate (2800 g ai/ha) mixed with Hel-Fire adjuvant (448 ml/ha), Glyphosate (2241 g ai/ha) mixed with Hel-Fire adjuvant (448 ml/ha)                                                                                                                                                      |

|      |              |                                                                                                                                                                                                            |
|------|--------------|------------------------------------------------------------------------------------------------------------------------------------------------------------------------------------------------------------|
|      | Winter wheat | Glyphosate (1680 g ai/ha) preemergence, fluroxypyr 1-methylheptyl ester (946 g ai/ha) mixed with AWS adjuvant (105 ml/ha). Urea (242 kg/ha). Seeding rate = 83 kg/ha.                                      |
| 2013 | Cover crop   | In-crop grazing with 8 sheep for 32 days. Post-harvest grazing with 20 sheep for 1 day. Disked twice. Seeding rate = 191 kg/ha.                                                                            |
|      | Winter wheat | Post-harvest grazing with 12 sheep for 54 days. Chiseled once. Seeding rate = 125 kg/ha.                                                                                                                   |
| 2014 | Cover crop   | Pre-plant grazing with 6 sheep for 40 days. In-crop grazing with 16 sheep for 16 days. Post-harvest grazing with 25 sheep for 7 days.                                                                      |
|      | Winter wheat | Post-harvest grazing with 12 sheep for 60 days. Chiseled once. Seeding rate = 121 kg/ha.                                                                                                                   |
| 2015 | Cover crop   | Pre-plant grazing with 30 sheep for 2 days. In-crop grazing with 18 sheep for 5 days and 36 sheep for 9 days. Post-harvest grazing with 24 sheep for 1 day, 220 sheep for 3 days, and 220 sheep for 3 days |
|      | Winter wheat | In-crop grazing with 28 sheep for 5 days. Post-harvest grazing with 12 sheep for 65 days. Harrowed once. Seeding rate = 157 kg/ha.                                                                         |
| 2016 | Cover crop   | In-crop grazing with 17 sheep for 8 days and 8 sheep for 4 days. Post-harvest grazing with 17 sheep for 3 days, 17 for 3 days, and 29 sheep for 3 days.                                                    |
|      | Winter wheat | In-crop grazing with 18 sheep for 5 days and 36 sheep for 9 days. Post-harvest grazing with 24 sheep for 1 day, 220 sheep for 3 days, and 220 sheep for 3 days. Seeding rate = 157 kg/ha.                  |
| 2017 | Cover crop   | Post-harvest grazing with 17 sheep for 1 day, and 30 sheep for 2 days.                                                                                                                                     |
|      | Winter wheat | In-crop grazing with 11 sheep for 16 days. Chiseled once. Seeding rate = 124 kg/ha.                                                                                                                        |
| 2013 | Cover crop   | Disked twice. Seeding rate = 125 kg/ha.                                                                                                                                                                    |
|      | Winter wheat | Chiseled once. Seeding rate = 125 kg/ha.                                                                                                                                                                   |
| 2014 | Cover crop   | Disked once and chiseled once.                                                                                                                                                                             |
|      | Winter wheat | Chiseled once. Seeding rate = 121 kg/ha.                                                                                                                                                                   |
| 2015 | Cover crop   | Disked once, chiseled twice, and harrowed once.                                                                                                                                                            |
|      | Winter wheat | Chiseled twice and harrowed once. Seeding rate = 157 kg/ha.                                                                                                                                                |
| 2016 | Cover crop   | Disked three times and chiseled once.                                                                                                                                                                      |
|      | Winter wheat | Chiseled twice. Seeding rate = 157 kg/ha.                                                                                                                                                                  |
| 2017 | Cover crop   | Disked twice.                                                                                                                                                                                              |
|      | Winter wheat | Chiseled twice. Seeding rate = 124 kg/ha.                                                                                                                                                                  |

<sup>β</sup>Austrian winter was planted in fall 2012 for Year 1 (2013) of the experiment because of the biennial nature of yellow sweet clover which would have required a previous year of seeding, but Year 2-5 (2014-2017) were seeded to sweet clover, as cover crops.

\*Hel-Fire: mix of aminated phosphoric, carboxylic acids, sulphurated amides, spray deposition aids.

<sup>^</sup>Seeding rate is not available for clover cover crops.

<sup>¥</sup>Urea (46-0-0).

<sup>\*\*</sup>MSO: Methylated seed oil.

<sup>§</sup>AWS: adding ammonium sulfate (nitrogen-based fertilizers).

<sup>‡</sup>R11: Alkylphenol ethoxylate, butyl alcohol, and Dimethylpolysiloxane (90% by wt).

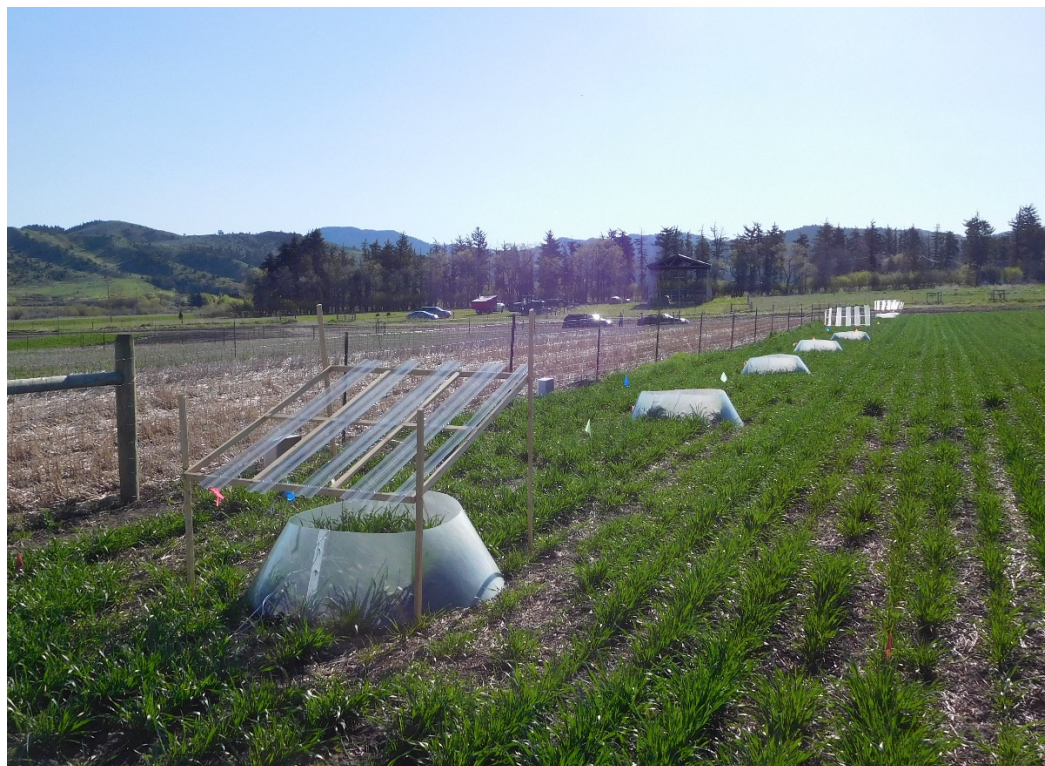

**Figure S1.** Photos of the study with temperature (open top chambers) and moisture manipulation (rainout shelters) structures.

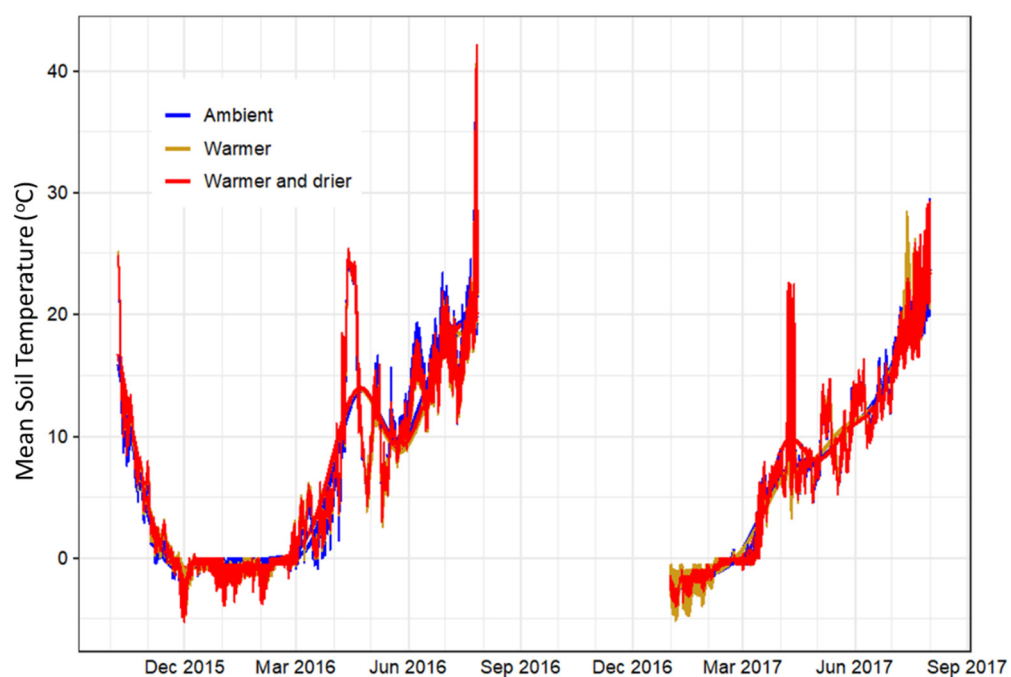

**Figure S2.** Daily soil temperature 5 cm below the surface in winter wheat fields with ambient conditions and climate manipulations that made the soil temperature warmer using open-top chambers, and warmer and drier using open-top chambers and rainout shelters that block 50% of the area above the plots.

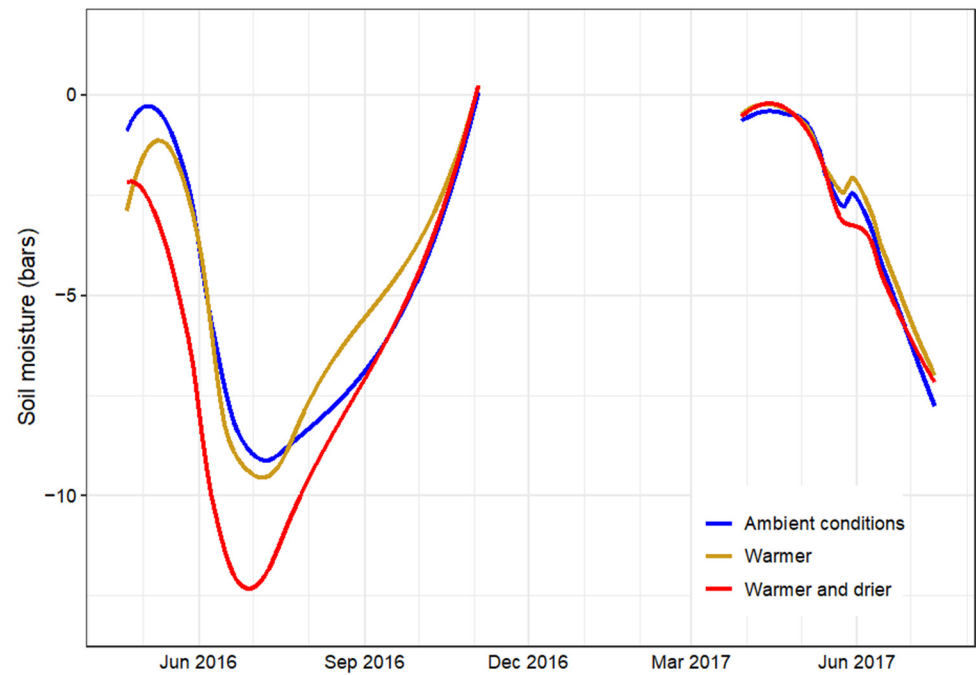

**Figure S3.** Seasonal variation in soil moisture 5 cm below the surface in winter wheat fields with ambient conditions and climate manipulations that made the soil temperature warmer using open-top chambers, and warmer and drier using open-top chambers and rainout shelters that block 50% of the area above the plots.
